# Supplementary material for: A gap in nitrous oxide emission reporting complicates long-term climate mitigation
Source: PubMed Central journal article supplement — Proc Natl Acad Sci U S A. 2022 Jul 25;119(31):e2200354119. doi: 10.1073/pnas.2200354119 (PMC9351463; doi:10.1073/pnas.2200354119), 2022-07-25
Supplement: pnas.2200354119.sapp.pdf [file pnas.2200354119.sapp.pdf]

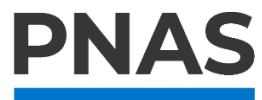

**Supplementary Information for**  
A Gap in Nitrous Oxide Emissions Reporting Complicates Long Term  
Climate.

Stephen J. Del Grosso, Stephen M. Ogle, Cynthia Nevison, Ram Gurung, William J. Parton,  
Claudia Wagner-Riddle, Ward Smith, Wilfried Winiwarter, Brian Grant, Mario Tenuta, Ernie Marx,  
Shannon Spencer, Stephen Williams

Stephen J. Del Grosso  
[steve.delgrosso@ars.usda.gov](mailto:steve.delgrosso@ars.usda.gov)

**This PDF file includes:**

Figures S1 to S2 (not allowed for Brief Reports)  
Tables S1 to S2 (not allowed for Brief Reports)  
SI References

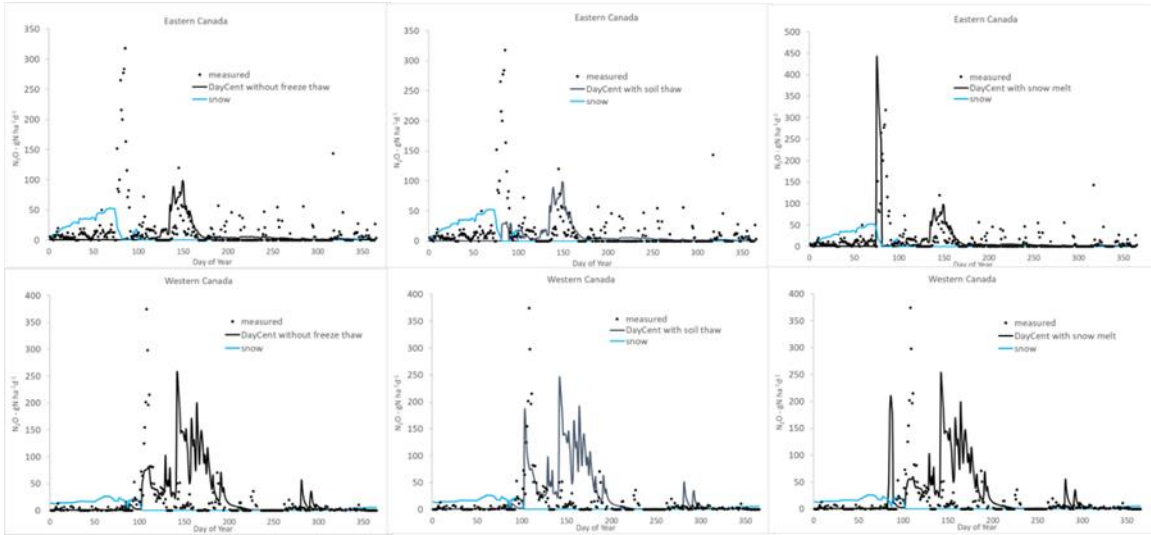

**Fig. S1.** Simulated and observed N<sub>2</sub>O emissions from cropped soils in Eastern and Western Canada comparing DayCent without freeze-thaw and enhancements based on thawing of soil and melting of snow, and simulated snowpack..

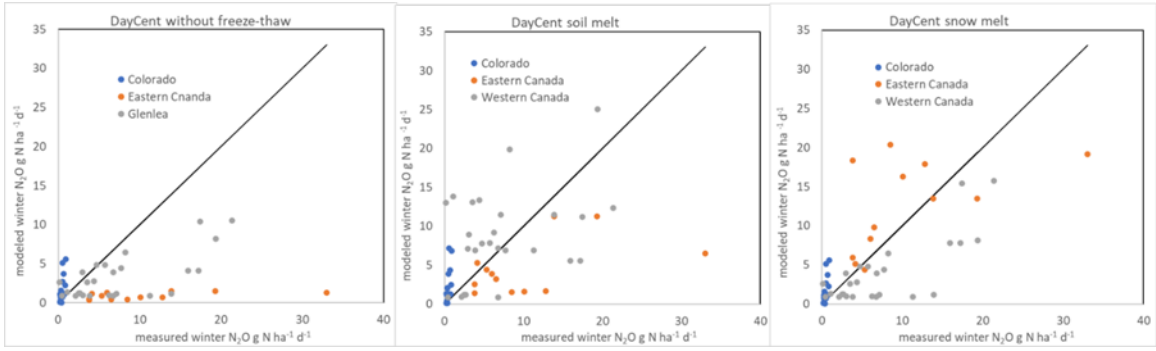

**Fig. S2.** N<sub>2</sub>O emissions from cropped soils used for model parameterization in Colorado, Eastern and Western Canada comparing DayCent without freeze-thaw and enhancements based on thawing of soil and melting of snow.

**Table S1.** Research sites used for freeze-thaw related N<sub>2</sub>O emission calibration of the DayCent model. Fluxes were measured at the Colorado site using ground level chamber-based measurements and the Canadian sites used micro metrological flux data.

| Site                  | crop                                                | tillage                  | N fertilizer kg N ha <sup>-1</sup> | years     |
|-----------------------|-----------------------------------------------------|--------------------------|------------------------------------|-----------|
| ARDEC, Colorado (1)   | maize                                               | conventional             | 0                                  | 2002-2004 |
| ARDEC Colorado        | maize                                               | no till                  | 0                                  | 2002-2004 |
| ARDEC Colorado        | maize                                               | conventional             | 130                                | 2002-2004 |
| ARDEC Colorado        | maize                                               | no till                  | 130                                | 2002-2004 |
| ARDEC Colorado        | maize                                               | conventional             | 170                                | 2002-2004 |
| ARDEC Colorado        | maize                                               | no till                  | 170                                | 2002-2004 |
| ARDEC Colorado        | maize                                               | conventional             | 70                                 | 2003-2004 |
| ARDEC Colorado        | maize                                               | no till                  | 70                                 | 2003-2004 |
| Elora, Ontario (2)    | maize, soybean, wheat, clover                       | no till                  | 160, 0, 90                         | 2000-2005 |
| Elora Ontario         | maize, soybean, wheat                               | conventional             | 60 <sup>1</sup> , 0, 60            | 2000-2005 |
| Glenlea, Manitoba (3) | maize, faba bean, alfalfa                           | conventional on<br>maize | 90, 0, 0                           | 2006-2012 |
| Glenlea Manitoba      | maize, faba bean, spring<br>wheat, rapeseed, barley | conventional             | 130, 0, 110, 150, 110              | 2006-2012 |
| Glenlea Manitoba      | maize, faba bean, spring<br>wheat, rapeseed, barley | conventional             | 130, 0, 110, 150, 110              | 2006-2012 |
| Glenlea Manitoba      | Maize, faba bean, alfalfa                           | conventional             | 90, 0, 0                           | 2006-2012 |

<sup>1</sup>Organic N

**Table S2.** Comparisons of the the DayCent model without freeze-thaw) and different optimized freeze-thaw models with N<sub>2</sub>O flux data from research sites in Sup. Table 1 for January-April mean fluxes. CFDmin is the minimum cumulative freezing degree days required to trigger a pulse of minimum magnitude and pulse magnitude increases linearly up to CFDmax.

$$CFD = \sum_{i=1}^n (-T_s) \quad \text{For } T_s < 0^\circ\text{C, where } T_s \text{ is soil temperature at 5 cm depth and } n = \text{number of days over the non-growing season}$$

| Event Conditions                                      | Event Activation  | CFDmin | CFDmax | Site level Comparisons |       |      | Inversion Comparison |
|-------------------------------------------------------|-------------------|--------|--------|------------------------|-------|------|----------------------|
|                                                       |                   |        |        | RMSE                   | Bias  | r    | r                    |
| No freeze thaw                                        |                   |        |        | 7.57                   | -3.99 | 0.45 | 0.74                 |
| Snow Accumulation                                     | Snow Melt         |        |        | 6.21                   | -0.27 | 0.49 |                      |
| CFD without reset after F-T events                    | Thawing in 0-2 cm | 90     | 180    | 7.34                   | 0.10  | 0.52 |                      |
| CFD with reset after F-T events                       | Thawing in 0-2 cm | 5      | 25     | 6.49                   | -0.33 | 0.57 |                      |
| CFD without reset after F-T events                    | Thawing in 2-5 cm | 100    | 180    | 6.74                   | -0.22 | 0.56 | 0.81                 |
| CFD with reset after F-T events                       | Thawing in 2-5 cm | 5      | 10     | 6.28                   | -0.33 | 0.56 |                      |
| Snow Accumulation, CFD without reset after F-T events | Snow Melt         | 190    | 280    | 5.31                   | -0.93 | 0.56 | 0.68                 |
| Snow Accumulation, CFD with reset after F-T events    | Snow Melt         | 110    | 160    | 4.52                   | -0.36 | 0.56 | 0.71                 |

## SI References

1. A.R. Mosier, A.D. Halvorson, C.A. Reule, X.J Liu, Net global warming potential and greenhouse gas intensity in irrigated cropping systems in northeastern Colorado. *Journal of environmental quality*, 35(4),1584-1598 (2006).
2. C. Wagner-Riddle, et al., Intensive measurement of nitrous oxide emissions from a corn–soybean–wheat rotation under two contrasting management systems over 5 years. *Global Change Biology* 13: 1722–1736 (2007).
3. S.E. Maas, A.J. Glenn, M. Tenuta, D.B. Amiro, Net CO<sub>2</sub> and N<sub>2</sub>O exchange during perennial forage establishment in an annual crop rotation in the Red River Valley, Manitoba. *Can. J. Soil Sci.* 93: 639-652 (2013).
